# Supplementary material for: Predicting Long-Term Ventricular Arrhythmia Risk in Children with Acute Lymphoblastic Leukemia Using Normal Values of Ventricular Repolarization Markers Established from Japanese Cohort Study
Source: MDPI journal article supplement (doi:10.3390/jcm12144723), 2023-07-17
Supplement: s1 [file s1]

TABLE S1 Ventricular repolarization markers of Japanese school children

| Age              |      | 1 <sup>st</sup> graders (6-7 years old) |                     | 7 <sup>th</sup> graders (12-13 years old) |                     |
|------------------|------|-----------------------------------------|---------------------|-------------------------------------------|---------------------|
| Subjects         |      | 100 (49/51)                             |                     | 100 (56/44)                               |                     |
|                  |      | Mean                                    | SD                  | Mean                                      | SD                  |
| Heart rate (bpm) |      | 82                                      | 11                  | 72                                        | 13                  |
| Tpe              | (ms) | 70<br>(69/70)                           | 7<br>(7/7)          | 78<br>(77/80)                             | 9<br>(8/9)          |
| QT               | (ms) | 328<br>(323/329)                        | 22<br>(20/24)       | 364<br>(362/365)                          | 27<br>(27/27)       |
| QTc              | (ms) | 365<br>(364/366)                        | 20<br>(18/21)       | 385<br>(384/386)                          | 20<br>(20/20)       |
| Tpe/QT           |      | 0.21<br>(0.21/0.21)                     | 0.02<br>(0.02/0.02) | 0.22<br>(0.21/0.22)                       | 0.02<br>(0.02/0.02) |

Values in parentheses are the data of boys/girls. SD, standard deviation

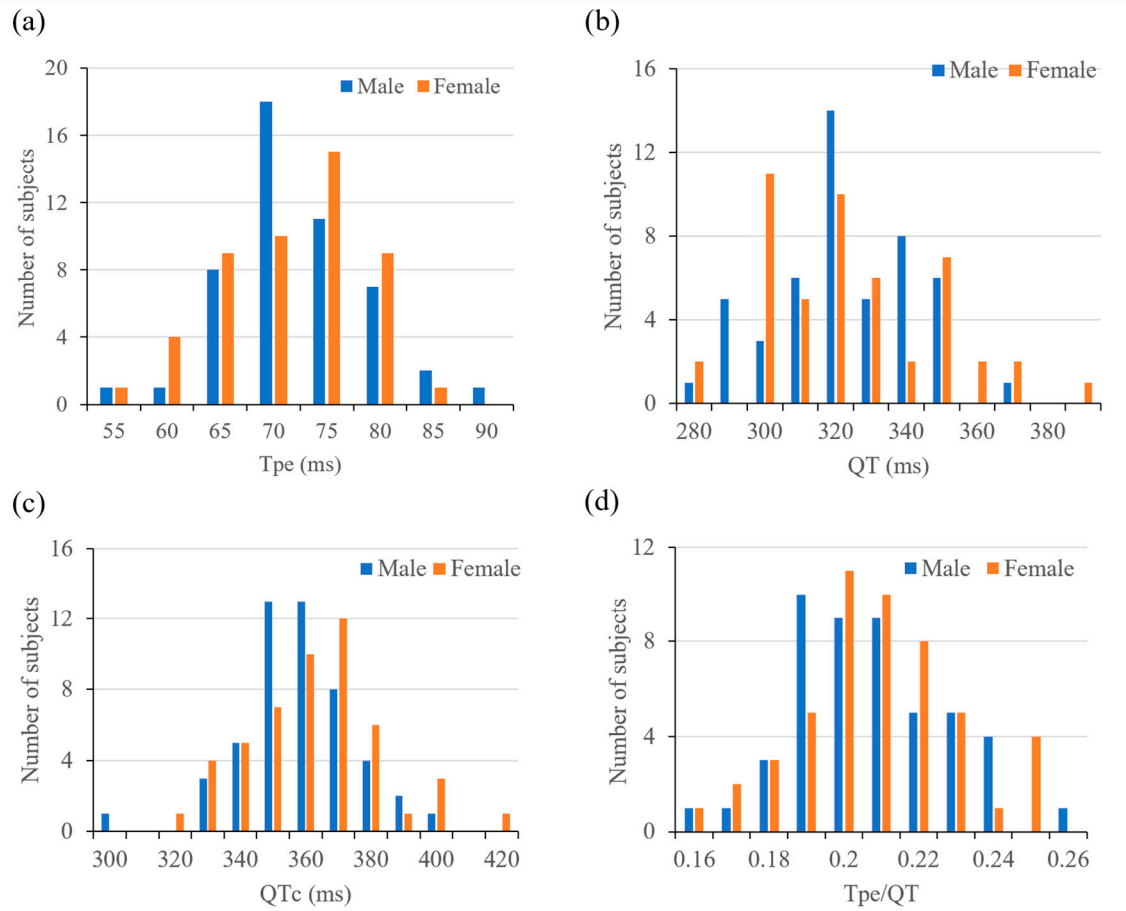

**Figure S1. Distribution of the ventricular repolarization marker values in 1<sup>st</sup> graders.**

The (A) Tpe interval, (B) QT interval, (C) QTc interval, and (D) Tpe/QT ratio. The values of Tpe interval, QT interval, and Tpe/QT ratio were found to be normally distributed by the Shapiro-Wilk test (P-value 0.133, 0.166, and 0.183, respectively), whereas the QTc interval was not normally distributed (P-value 0.014). Among them, the Tpe interval, QT interval, -and Tpe/QT ratio values in males and females were normally distributed (P-value male/female=0.084/0.311, 0.066/0.071, and 0.135/0.316, respectively). The QTc

interval of females were normally distributed (P-value 0.065), whereas the QTc interval of males was not normally distributed (P-value 0.005).

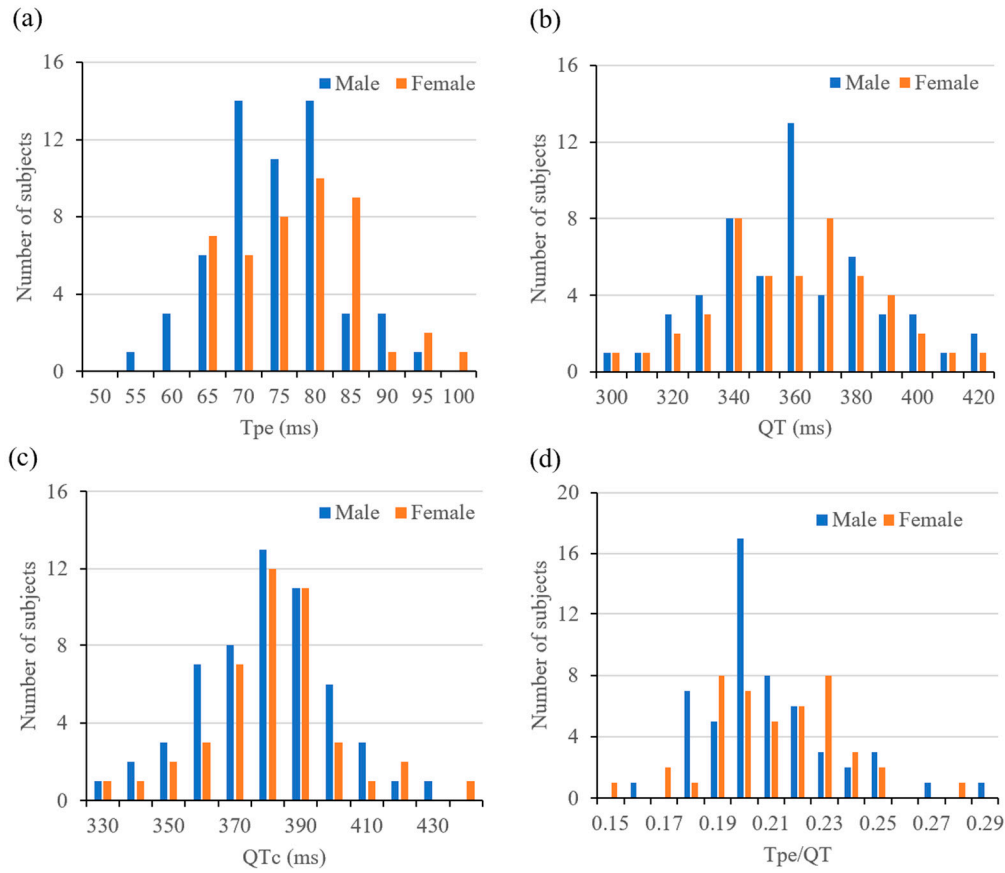

**Figure S2. Distribution of ventricular repolarization marker values in 7<sup>th</sup> graders.**

(A) Tpe interval, (B) QT interval, (C) QTc interval, and (D) Tpe/QT ratio. The Tpe interval and QT interval were found to be normally distributed by the Shapiro-Wilk test (P-value 0.060 and 0.157, respectively), whereas the QTc interval and Tpe/QT ratio were not normally distributed (P-value 0.02 and 0.001). The Tpe interval, QT interval and Tpe/QT of males and females were not normally distributed (P-value male/female=0.01/0.03, 0.018/0.042, 0.002/0.012, respectively). QTc interval of males were normally distributed (P 0.108), whereas the QTc intervals of females were not normally distributed (P 0.004).

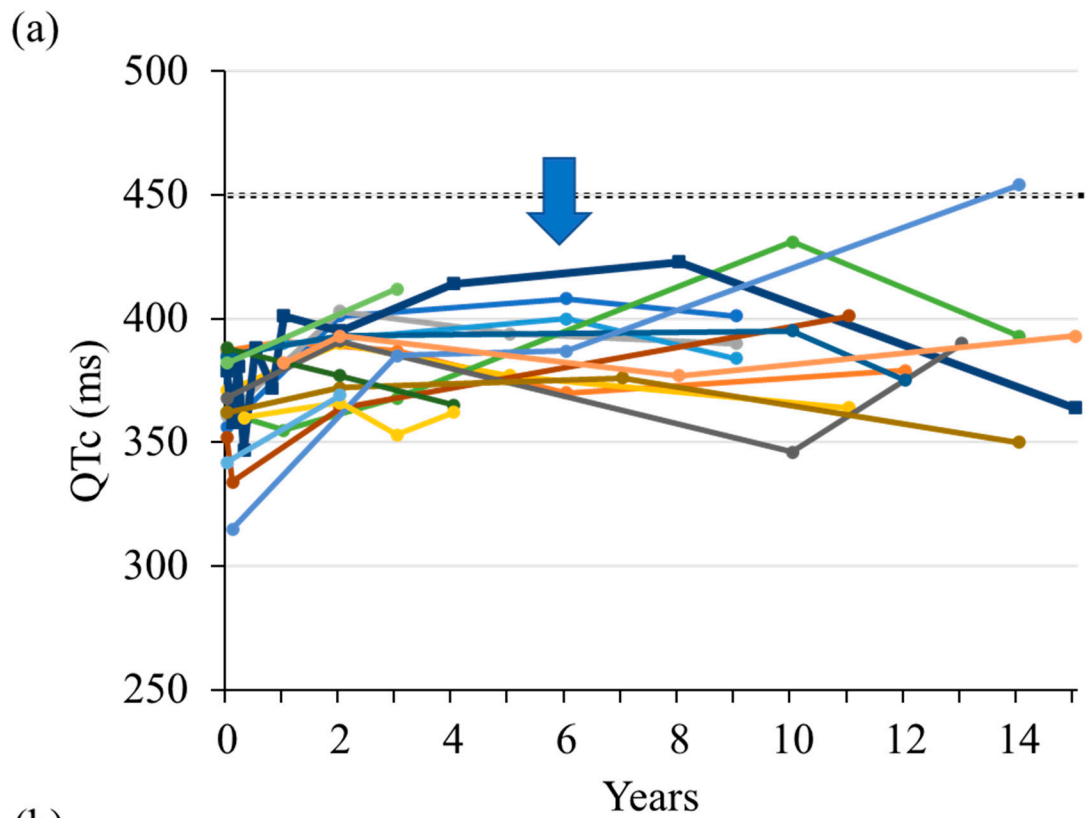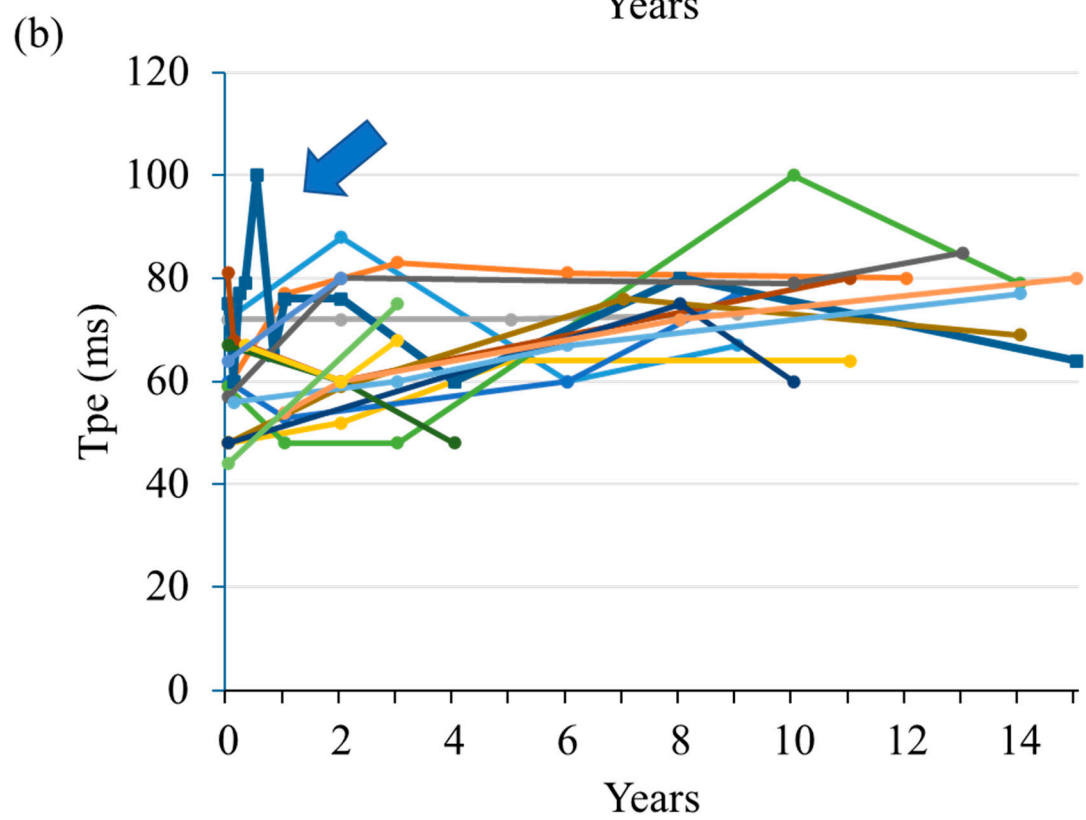

**Figure S3. Chronological changes of ventricular repolarization marker values in 17 pediatric ALL patients.**

(A) QTc interval, (B) Tpe interval. The horizontal dotted line indicates the upper level of QTc (450 ms) based on the guideline. [1] The QTc interval in all patients was less than 450 milliseconds during the intensive phase of treatment for ALL. A patient, who is indicated by the blue arrow with dark blue squares with a thick line, suffered from acute heart failure during the intensive phase of treatment of ALL. Transient prolongation of the Tpe interval was observed in the patient during the same period; however, the QTc interval remained in the normal range during treatment and throughout the follow-up period.
